# Supplementary material for: Construction of Four Zn(II) Coordination Polymers Used as Catalysts for the Photodegradation of Organic Dyes in Water
Source: Polymers (Basel). 2016 Jan 6;8(1):3. doi: 10.3390/polym8010003 (PMC6432541; doi:10.3390/polym8010003)
Supplement: Supplementary file 1 [file polymers-08-00003-s001.pdf]

# Supplementary Materials: Construction of Four Zn(II) Coordination Polymers Used as Catalysts for the Photodegradation of Organic Dyes in Water

Lei-Lei Liu, Cai-Xia Yu, Wei Zhou, Qi-Gui Zhang, Shi-Min Liu and Yun-Feng Shi

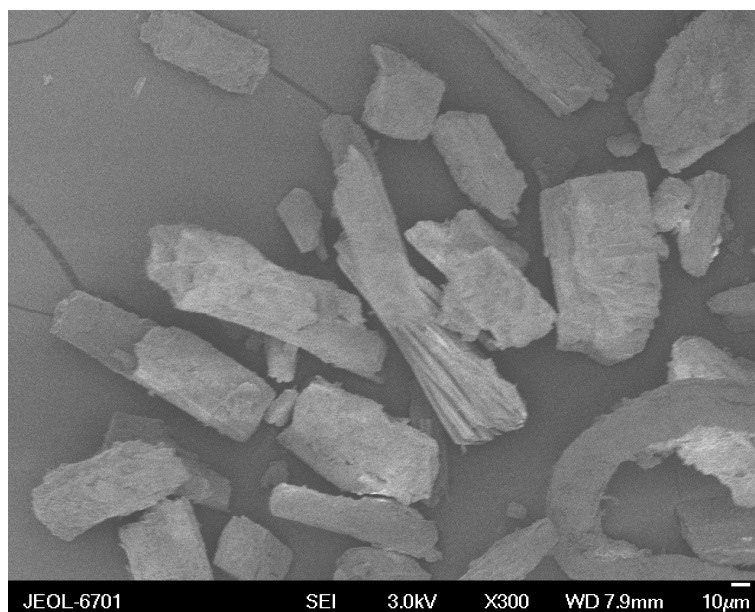

Figure S1. SEM image of the grinded samples for 1.

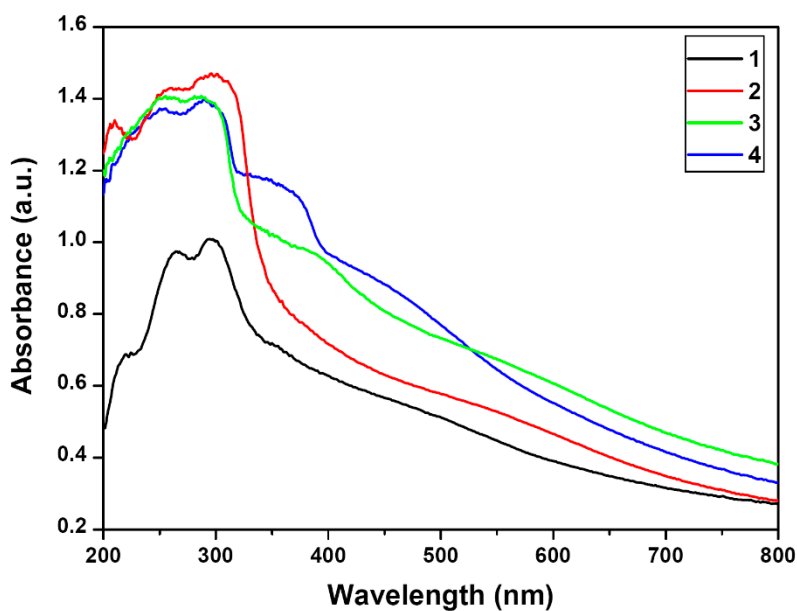

Figure S2. UV-vis adsorption spectra of 1–4 in the solid state at ambient temperature.

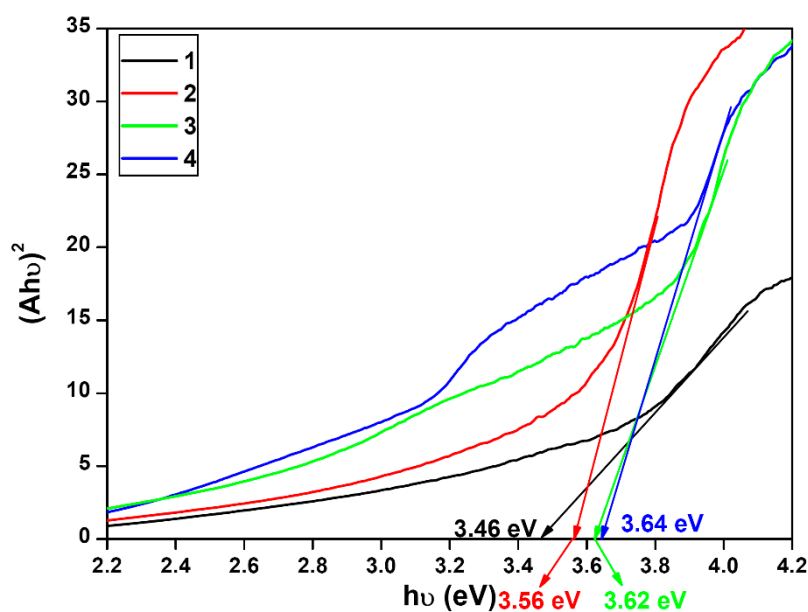

Figure S3.  $(Ah\nu)^2$ - $h\nu$  curves of 1-4.

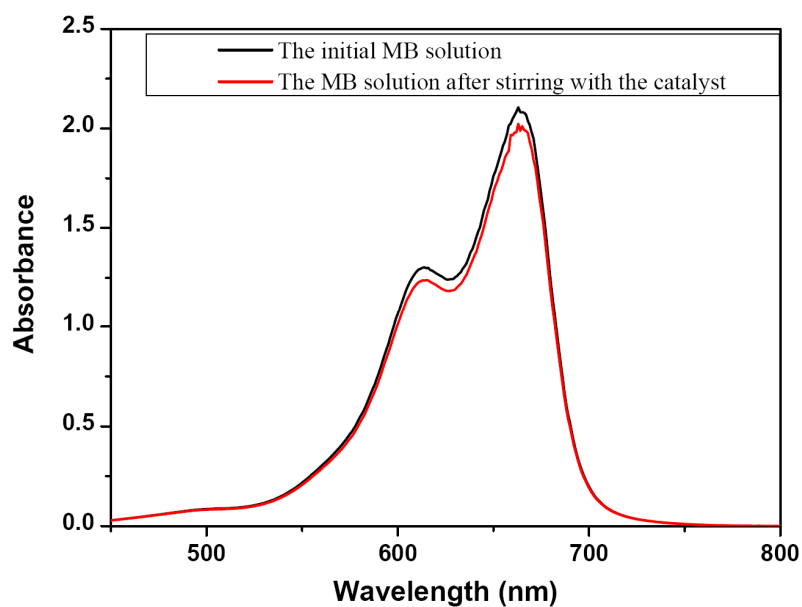

Figure S4. The UV-vis adsorption spectra of the initial MB solution and the MB solution after stirring with the catalyst about 30 min.

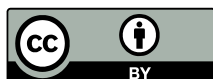

© 2016 by the authors; licensee MDPI, Basel, Switzerland. This article is an open access article distributed under the terms and conditions of the Creative Commons by Attribution (CC-BY) license (<http://creativecommons.org/licenses/by/4.0/>).
